# Supplementary material for: Mobility capillary electrophoresis–native mass spectrometry reveals the dynamic conformational equilibrium of calmodulin and its complexes
Source: Royal Society of Chemistry journal article supplement (doi:10.1039/d4an00378k), 2024-01-01
Supplement: d4an00378k1.pdf [file d4an00378k1.pdf]

# Mobility capillary electrophoresis-native mass spectrometry reveals dynamic conformational equilibrium of calmodulin and its complexes

## *Supporting information*

Yi Zhao<sup>1</sup>, Wenjing Zhang<sup>1</sup>, Jie Hong<sup>2</sup>, Lei Yang<sup>1</sup>, Yuanyuan Wang<sup>4</sup>, Feng Qu<sup>3</sup> and  
Wei Xu<sup>1\*</sup>

<sup>1</sup>School of Medical Technology, Beijing Institute of Technology, Beijing 100081, China

<sup>2</sup>Kunshan Nier Precision Instrumentation Inc. Kunshan, Suzhou, 215316, China

<sup>3</sup>School of Life Science, Beijing Institute of Technology, Beijing 100081, China

<sup>4</sup> College of Traditional Chinese Medicine, Shandong University of Traditional Chinese Medicine, Jinan, 250355, China

\*Corresponding Author:

|                                                                                                                                                                                       |                                                                                                                                                                            |
|---------------------------------------------------------------------------------------------------------------------------------------------------------------------------------------|----------------------------------------------------------------------------------------------------------------------------------------------------------------------------|
| <b>Wei Xu</b><br>School of Medical Technology<br>Beijing Institute of Technology<br>Haidian, Beijing, 100081, China;<br>Email: <a href="mailto:weixu@bit.edu.cn">weixu@bit.edu.cn</a> | <b>Feng Qu</b><br>School of Life Science, Beijing Institute<br>of Technology, Beijing 100081, China<br>Email: <a href="mailto:qufengqu@bit.edu.cn">qufengqu@bit.edu.cn</a> |
|---------------------------------------------------------------------------------------------------------------------------------------------------------------------------------------|----------------------------------------------------------------------------------------------------------------------------------------------------------------------------|

### Calculation of protein hydrodynamic radius

The hydrodynamic radius of a protein or protein complexes could be determined by the Stokes equation:

$$R_h = \frac{4k_B T \sigma^2}{\pi \eta t_R R_c^2} \quad (1)$$

in which  $k_B$  is the Boltzmann constant,  $T$  is the working temperature in the capillary,  $R_c$  is the capillary inner diameter, and  $\eta$  is the viscosity coefficient of the buffer solution,  $t_R$  and  $\sigma^2$  are the peak arrival time and temporal standard deviation of the protein after Gauss fit.

In MCE experience, the  $R_h$  was corrected as:

$$R_h = \frac{R_{hn} D_n}{D} = \frac{R_{hn} t_p^3 \sigma_r^2}{t_r^3 \sigma_p^2} \quad (2)$$

where  $R_{hn}$  is the hydrodynamic radius of phenol,  $t_p$  and  $\sigma_p$  are the peak arrival time and temporal standard deviation of phenol after Gauss fit,  $t_r$  and  $\sigma_r$  are the peak arrival time and temporal standard deviation of protein and protein complexes after Gauss fit.

### Calculation of protein ellipsoid radii

The average charge state could be calculated

$$Z_{av} = \frac{\sum_n n I_n}{\sum_n I_n} \quad (3)$$

$I_n$  is the signal intensity of the charge state  $n$

Then SASA could be computed by

$$\ln(\text{SASA}) = \frac{\ln(Z_{av}) + 4.1902}{0.7045} \quad (4)$$

The semi-major axis ( $a$ ) was obtained from (5)

$$\text{SASA} = 4\pi a^2 \quad (5)$$

The following formulas were used to calculate the  $b$  and  $c$ :

$$R_{h-r_s} = \frac{8c_1}{3} \times \frac{2\phi_1}{\phi_1^2 - 1} + \frac{2\phi_1 - \phi_1^3}{(1 - \phi_1^2)^{1.5}} \ln^{[i\phi]} \left( \frac{1 + \sqrt{1 - \phi_1^2}}{1 - \sqrt{1 - \phi_1^2}} \right) \quad (6)$$

$$R_h - r_s = \frac{8a}{3} \frac{1 - \phi_2 - \frac{2\phi_2^2 - 3}{(1 - \phi_2^2)^{1.5}} \text{Arcsin}\sqrt{1 - \phi_2^2}}{1 - \phi_2^2} \quad (7)$$

$$c = \frac{\phi_1 c_1 + \phi_2 c_2}{\phi_1 + \phi_2} \quad (8)$$

$$V = \frac{4}{3} \pi (R_h - r_s)^3 = \frac{4}{3} \pi abc \quad (9)$$

in which  $\phi_1 = c_1/a$ ,  $\phi_2 = c_2/a$ ,  $r_s$  is the thickness of the hydration layer.

## Manhattan Distance Method

```
import pandas as pd
import numpy as np
df = pd.read_excel('stackChartData2.xlsx',header=None)
graph_num = 3
x_num = 5
color_num = 5
total_graph1=[]
for i in range(0,graph_num):
    graph_item = {}
    graph_item['id']=i+1
    for j in range(0,color_num):
        x_axis = np.arange(0,x_num,1)
        y_axis = df.iloc[0:x_num,2+i*7+j]
        computeList = []
        computeList.extend(y_axis)
        color_name = 'color'+str(j+1)
        graph_item[color_name] = computeList
    total_graph1.append(graph_item)

for i in range(0,graph_num):
    graph1 = total_graph1[i]
    for j in range(1+i,graph_num):
        graph2 = total_graph1[j]
        scoreSum = 0
        for k in range(0,color_num):
            color_name = 'color'+str(k+1)
            a = graph1[color_name]
            b = graph2[color_name]
            c = [a[pp]-b[pp] for pp in range(0,x_num)]
            hh=0
            for cc in c:
                hh = hh +abs(cc)
            scoreSum = scoreSum +hh
        print('Graph'+str(i+1)+'-' + 'Graph'+str(j+1)+' score: '+str(scoreSum))
        scoreSum = 0
```

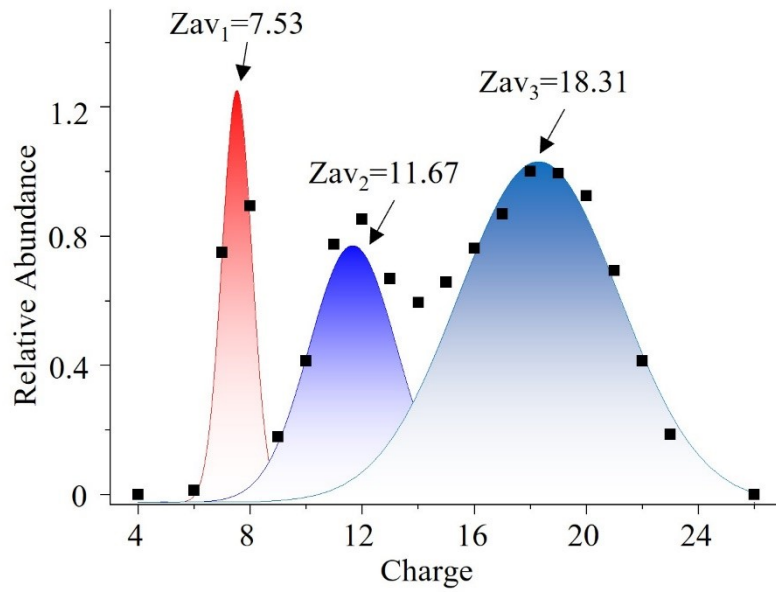

**Figure S1.** Gaussian-Fitting of apo-CaM mass spectrum. The black square represented the relative abundance of apo-CaM at different charge states, and the Gauss peaks from left to right corresponded to Group1, Group2, and Group3, respectively.

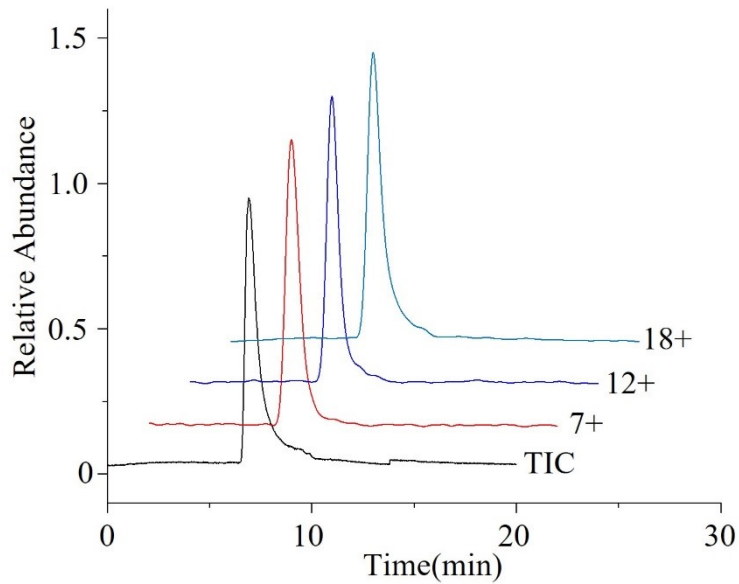

**Figure S2.** Ion flow diagram from size exclusion chromatography (SEC). (Bottom: Total ion chromatogram (TIC), followed by extracted ion chromatograms (EIC) for charge states 7+, 12+, and 18+, respectively.)

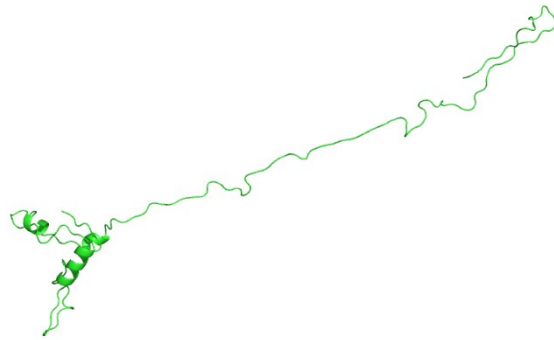

**Figure S3.** MD simulation of further unfolding structures of CaM during the ESI process <sup>1</sup>.

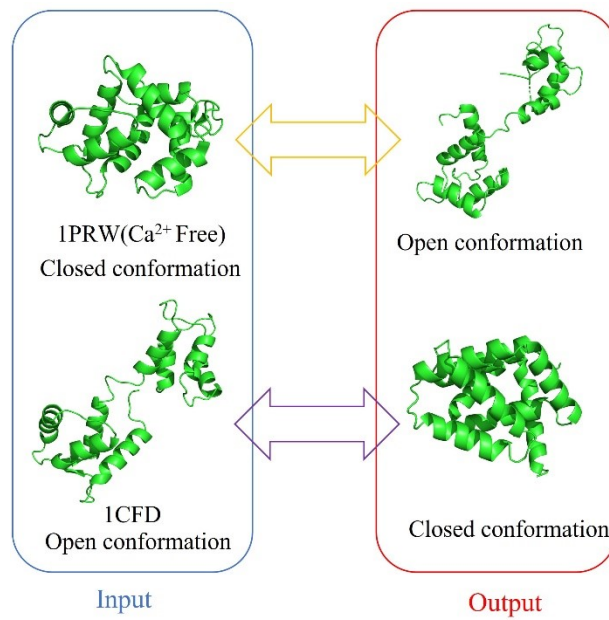

Figure S4. Str2str results of Apo-CaM interconverting between the closed and open conformations.

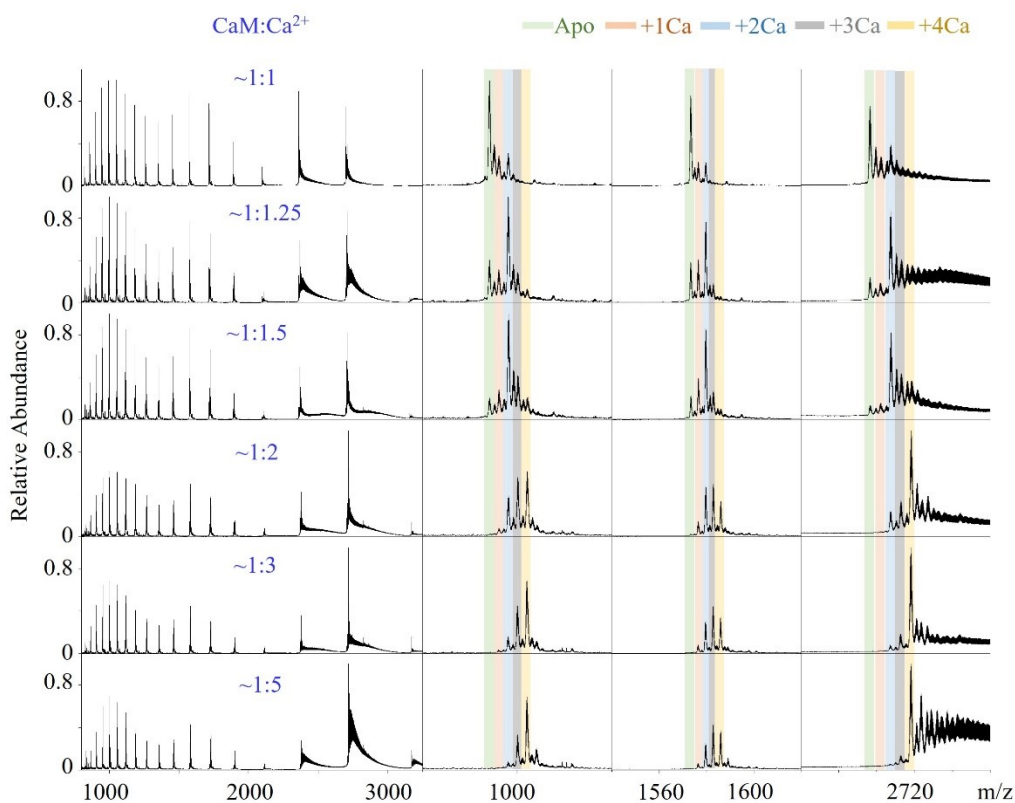

**Figure S5.** nMS spectrum of CaM at different CaM:Ca<sup>2+</sup> ratios: 1:1, 1:1.25, 1:1.5, 1:2, 1:3 and 1:5.

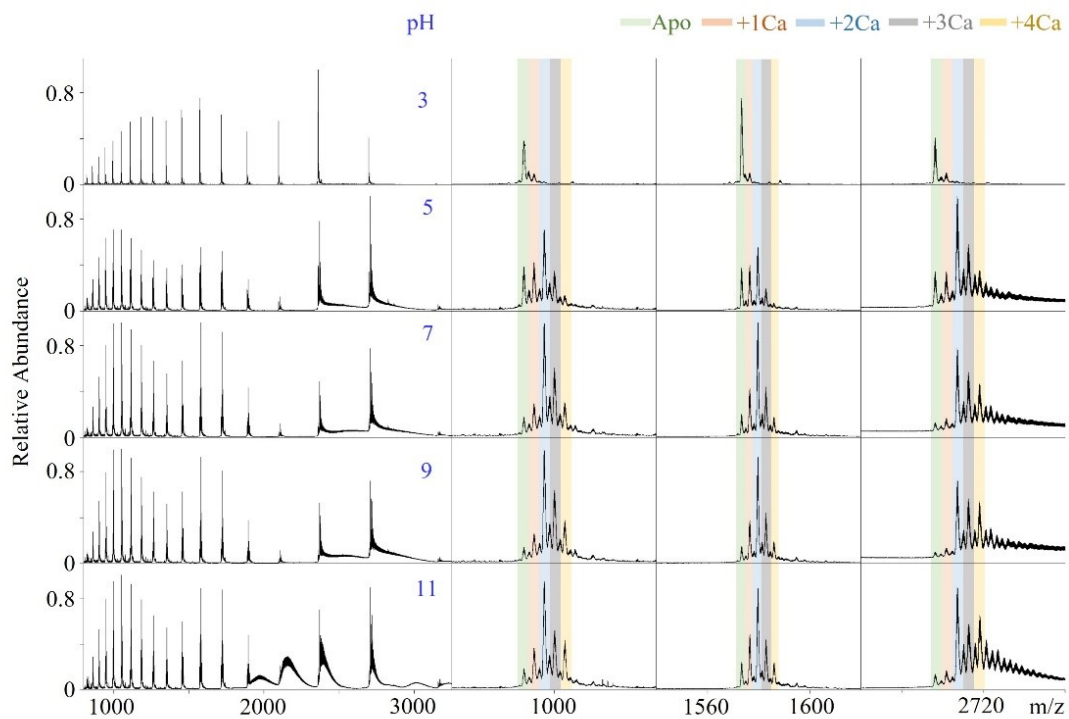

**Figure S6.** nMS spectrum of CaM at different pH (CaM:Ca<sup>2+</sup> ratio was 1:1.5).

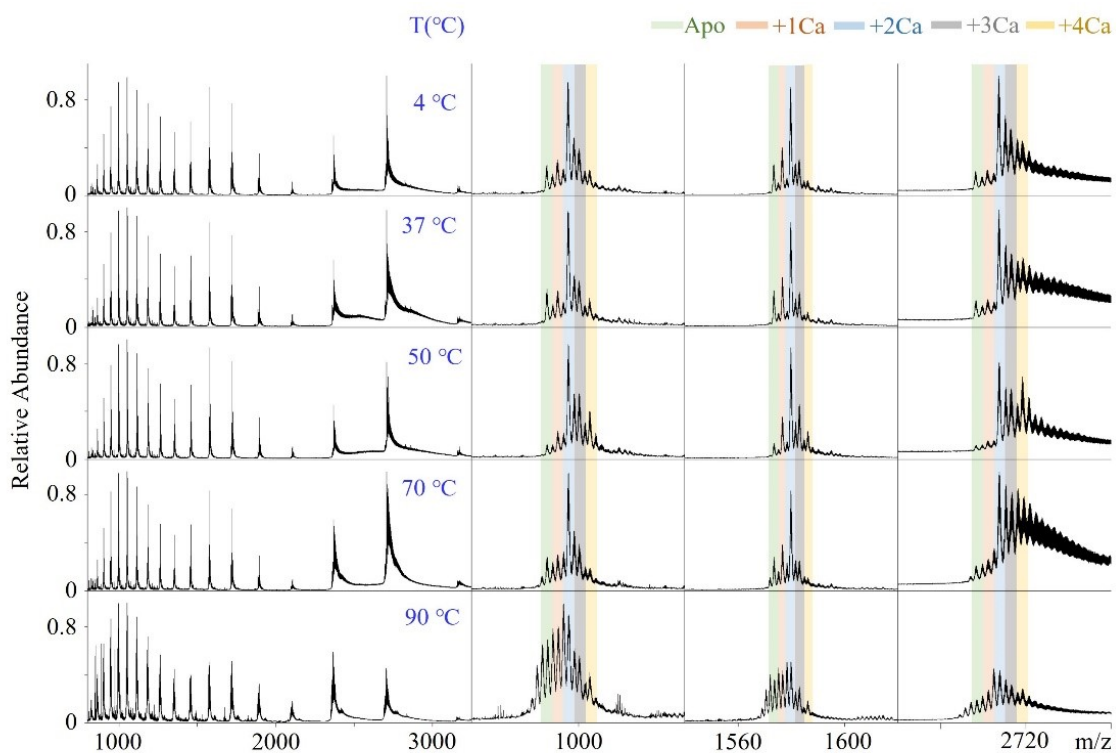

**Figure S7.** nMS spectrum of CaM at different temperature (CaM:Ca<sup>2+</sup> ratio was 1:1.5).

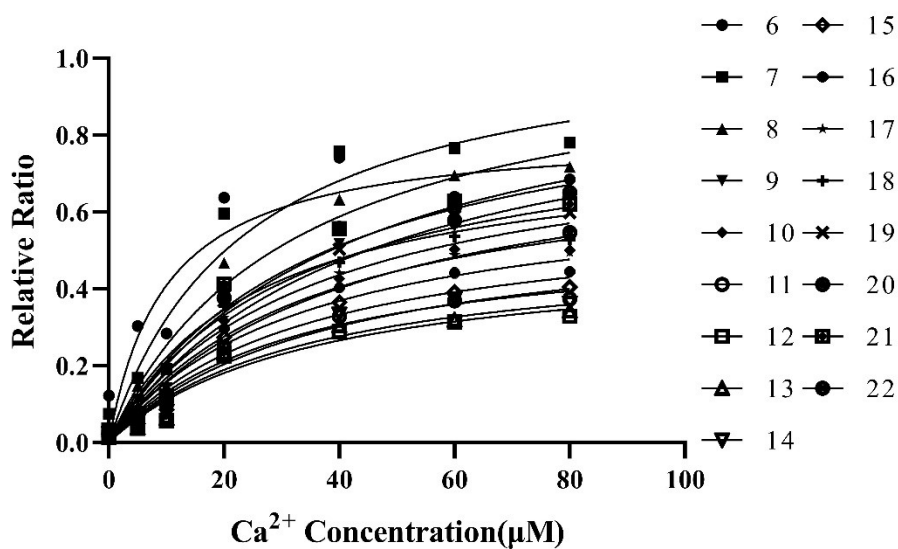

**Figure S8.** Cumulative  $K_d$  fitting curves of different charge states (The fitting equation

is given by  $y_m = \frac{B_{max} \times x}{K_d + x}$ , where  $B_{max}$  denotes the maximum binding capacity, and  $K_d$  represents the dissociation constant. The term  $y_m$  is calculated as



$$y_m = \frac{S_{4Ca^{2+} - CaM}}{\sum_{l=0}^4 S_{nCa^{2+} - CaM}}, \text{ where } S_{nCa^{2+} - CaM} \text{ signifies the absolute abundance of the } nCa^{2+}\text{-CaM at charge state } m).$$

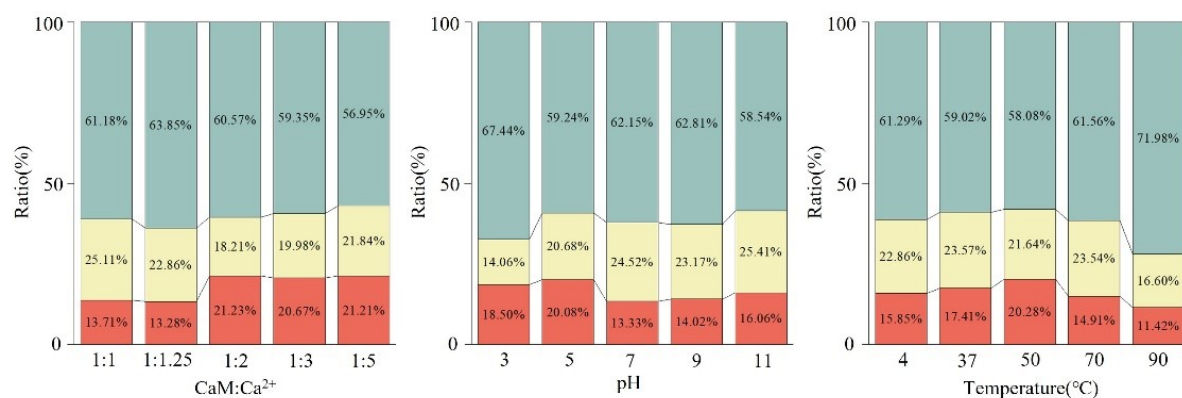

**Figure S9.** The proportion of three groups of CaM under different conditions. The red, yellow and blue sections represented group 1, group 2 and group 3, respectively.

**Table S1** Ellipsoids radii of group 1 and group 2

| Ellipsoids radii (Å)       | <i>a</i> | <i>b</i> | <i>c</i> |
|----------------------------|----------|----------|----------|
| Charge group 1             | 23       | 24       | 22       |
| 1CFD                       | 24       | 21       | 19       |
| Charge group 2             | 32       | 27       | 14       |
| 1PRW                       | 35       | 22       | 16       |
| 4Ca <sup>2+</sup> -CaM-Mel | 28       | 23       | 19       |
| 8AHS                       | 26       | 21       | 21       |

**Table S2** Relative ratio(%) of nCa<sup>2+</sup>-CaM at different Ca<sup>2+</sup> concentration of charge group 1

|                        | 1:1   | 1:1.5 | 1:2   | 1:3   | 1:5   |
|------------------------|-------|-------|-------|-------|-------|
| 0Ca <sup>2+</sup> -CaM | 44.38 | 8.91  | 2.53  | 2.12  | 3.33  |
| 1Ca <sup>2+</sup> -CaM | 17.44 | 9.53  | 3.62  | 2.45  | 3.92  |
| 2Ca <sup>2+</sup> -CaM | 20.55 | 42.10 | 17.03 | 7.59  | 4.65  |
| 3Ca <sup>2+</sup> -CaM | 9.67  | 22.01 | 22.41 | 16.63 | 11.47 |
| 4Ca <sup>2+</sup> -CaM | 7.96  | 17.45 | 54.42 | 71.20 | 76.63 |

**Table S3** Relative ratio(%) of nCa<sup>2+</sup>-CaM at different Ca<sup>2+</sup> concentration of charge group 2

|                        | 1:1   | 1:1.5 | 1:2   | 1:3   | 1:5   |
|------------------------|-------|-------|-------|-------|-------|
| 0Ca <sup>2+</sup> -CaM | 66.90 | 12.10 | 1.55  | 1.15  | 2.74  |
| 1Ca <sup>2+</sup> -CaM | 15.18 | 19.66 | 8.96  | 6.53  | 4.94  |
| 2Ca <sup>2+</sup> -CaM | 15.50 | 46.85 | 29.96 | 19.77 | 14.90 |
| 3Ca <sup>2+</sup> -CaM | 2.42  | 13.75 | 30.07 | 33.10 | 32.00 |
| 4Ca <sup>2+</sup> -CaM | 0.00  | 7.64  | 29.45 | 39.45 | 45.40 |

**Table S4** Relative ratio(%) of nCa<sup>2+</sup>-CaM at different Ca<sup>2+</sup> concentration of charge

group 3

|                        | 1:1   | 1:1.5 | 1:2   | 1:3   | 1:5   |
|------------------------|-------|-------|-------|-------|-------|
| 0Ca <sup>2+</sup> -CaM | 58.19 | 11.14 | 2.66  | 1.94  | 2.59  |
| 1Ca <sup>2+</sup> -CaM | 16.99 | 13.62 | 5.68  | 3.01  | 4.44  |
| 2Ca <sup>2+</sup> -CaM | 17.32 | 45.71 | 25.39 | 15.61 | 11.94 |
| 3Ca <sup>2+</sup> -CaM | 4.46  | 19.37 | 33.37 | 34.50 | 31.04 |
| 4Ca <sup>2+</sup> -CaM | 3.05  | 10.17 | 32.91 | 44.95 | 49.99 |

**Table S5** Relative ratio(%) of nCa<sup>2+</sup>-CaM at different pH of charge group 1

|                        | 3     | 5     | 7     | 9     | 11    |
|------------------------|-------|-------|-------|-------|-------|
| 0Ca <sup>2+</sup> -CaM | 77.98 | 14.79 | 6.67  | 5.44  | 6.36  |
| 1Ca <sup>2+</sup> -CaM | 15.23 | 15.01 | 8.93  | 7.84  | 9.36  |
| 2Ca <sup>2+</sup> -CaM | 3.98  | 36.91 | 36.93 | 35.39 | 35.73 |
| 3Ca <sup>2+</sup> -CaM | 1.66  | 20.73 | 26.66 | 27.54 | 24.13 |
| 4Ca <sup>2+</sup> -CaM | 1.16  | 12.56 | 20.81 | 23.78 | 24.42 |

**Table S6** Relative ratio(%) of nCa<sup>2+</sup>-CaM at different pH of charge group 2

|                        | 3     | 5     | 7     | 9     | 11    |
|------------------------|-------|-------|-------|-------|-------|
| 0Ca <sup>2+</sup> -CaM | 70.03 | 25.21 | 9.57  | 6.91  | 10.99 |
| 1Ca <sup>2+</sup> -CaM | 13.50 | 23.21 | 17.83 | 16.28 | 18.02 |
| 2Ca <sup>2+</sup> -CaM | 14.76 | 34.97 | 44.36 | 44.90 | 37.60 |
| 3Ca <sup>2+</sup> -CaM | 1.20  | 11.77 | 19.23 | 20.48 | 18.54 |
| 4Ca <sup>2+</sup> -CaM | 0.51  | 4.84  | 9.01  | 11.44 | 14.84 |

**Table S7** Relative ratio(%) of nCa<sup>2+</sup>-CaM at different pH of charge group 3

|                        | 3     | 5     | 7     | 9     | 11    |
|------------------------|-------|-------|-------|-------|-------|
| 0Ca <sup>2+</sup> -CaM | 80.00 | 19.94 | 8.05  | 6.60  | 8.19  |
| 1Ca <sup>2+</sup> -CaM | 15.22 | 21.05 | 13.18 | 12.06 | 17.06 |
| 2Ca <sup>2+</sup> -CaM | 0.78  | 35.11 | 41.67 | 40.41 | 39.93 |

|                        |      |       |       |       |       |
|------------------------|------|-------|-------|-------|-------|
| 3Ca <sup>2+</sup> -CaM | 2.09 | 16.77 | 24.78 | 26.69 | 20.45 |
| 4Ca <sup>2+</sup> -CaM | 1.91 | 7.13  | 12.32 | 14.24 | 14.37 |

**Table S8** Relative ratio(%) of nCa<sup>2+</sup>-CaM at different temperature of charge group 1

|                        |       |       |       |       |       |
|------------------------|-------|-------|-------|-------|-------|
|                        | 4     | 37    | 50    | 70    | 90    |
| 0Ca <sup>2+</sup> -CaM | 9.33  | 10.01 | 5.50  | 8.23  | 14.66 |
| 1Ca <sup>2+</sup> -CaM | 9.85  | 10.05 | 7.48  | 9.70  | 18.89 |
| 2Ca <sup>2+</sup> -CaM | 40.18 | 36.84 | 35.32 | 33.31 | 28.54 |
| 3Ca <sup>2+</sup> -CaM | 22.54 | 22.39 | 24.87 | 25.80 | 20.60 |
| 4Ca <sup>2+</sup> -CaM | 18.10 | 20.71 | 26.83 | 22.96 | 17.30 |

**Table S9** Relative ratio(%) of nCa<sup>2+</sup>-CaM at different temperature of charge group 2

|                        |       |       |       |       |       |
|------------------------|-------|-------|-------|-------|-------|
|                        | 4     | 37    | 50    | 70    | 90    |
| 0Ca <sup>2+</sup> -CaM | 14.15 | 16.48 | 6.79  | 15.83 | 21.18 |
| 1Ca <sup>2+</sup> -CaM | 18.85 | 18.92 | 15.50 | 17.99 | 25.64 |
| 2Ca <sup>2+</sup> -CaM | 44.78 | 42.68 | 44.11 | 45.45 | 27.13 |
| 3Ca <sup>2+</sup> -CaM | 14.38 | 13.62 | 20.19 | 13.32 | 14.98 |
| 4Ca <sup>2+</sup> -CaM | 7.84  | 8.30  | 13.41 | 7.41  | 11.07 |

**Table S10** Relative ratio(%) of nCa<sup>2+</sup>-CaM at different temperature of charge group 3

|                        |       |       |       |       |       |
|------------------------|-------|-------|-------|-------|-------|
|                        | 4     | 37    | 50    | 70    | 90    |
| 0Ca <sup>2+</sup> -CaM | 12.59 | 14.32 | 6.04  | 13.99 | 20.42 |
| 1Ca <sup>2+</sup> -CaM | 15.06 | 14.32 | 10.87 | 15.33 | 23.38 |
| 2Ca <sup>2+</sup> -CaM | 43.52 | 43.98 | 41.89 | 44.00 | 27.33 |
| 3Ca <sup>2+</sup> -CaM | 19.02 | 17.59 | 24.87 | 17.86 | 17.39 |
| 4Ca <sup>2+</sup> -CaM | 9.82  | 9.79  | 16.33 | 8.82  | 11.48 |

**Table S11** Dissociation constants ( $K_d$ ) of CaM at different charge states

|                  |      |       |       |       |       |       |       |       |       |
|------------------|------|-------|-------|-------|-------|-------|-------|-------|-------|
| Charge           | 6    | 7     | 8     | 9     | 10    | 11    | 12    | 13    | 14    |
| $K_d$ ( $\mu$ M) | 9.88 | 23.62 | 31.76 | 25.08 | 40.83 | 37.80 | 35.46 | 34.35 | 32.20 |

|                    |       |       |       |       |       |       |       |       |  |
|--------------------|-------|-------|-------|-------|-------|-------|-------|-------|--|
| Charge             | 15    | 16    | 17    | 18    | 19    | 20    | 21    | 22    |  |
| $K_d(\mu\text{M})$ | 32.89 | 33.14 | 35.43 | 35.63 | 43.37 | 41.53 | 35.74 | 31.83 |  |

## Reference

1. Luan, M.; Hou, Z.; Zhang, B.; Ma, L.; Yuan, S.; Liu, Y.; Huang, G., Inter-Domain Repulsion of Dumbbell-Shaped Calmodulin during Electrospray Ionization Revealed by Molecular Dynamics Simulations. *Analytical chemistry* **2023**, *95* (23), 8798-8806.
